# Supplementary material
Source: publisher figshare collection journal article supplement (https://rs.figshare.com/ndownloader/files/14949491)
Supplement: Supplementary file 1 [file 14949491]

# Sexual selection favours good or bad genes for pathogen resistance depending on males' pathogen exposure

Patrick Joye and Tadeusz J. Kawecki

Department of Ecology and Evolution, University of Lausanne, Switzerland

*Proceedings of the Royal Society B*, DOI:10.1098/rspb.2019-0226

## Supplementary material

Supplementary Figures S1 and S2.

Supplementary Tables S1 and S2.

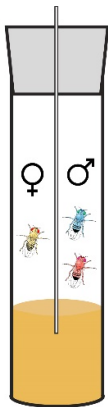

Supplementary Figure 1. A scheme of the vial used for mating contests. Flies of the two sexes are placed on opposite sides of a cardboard divider and let acclimatize. The assay is initiated when the separator is removed through the slit in the plug.

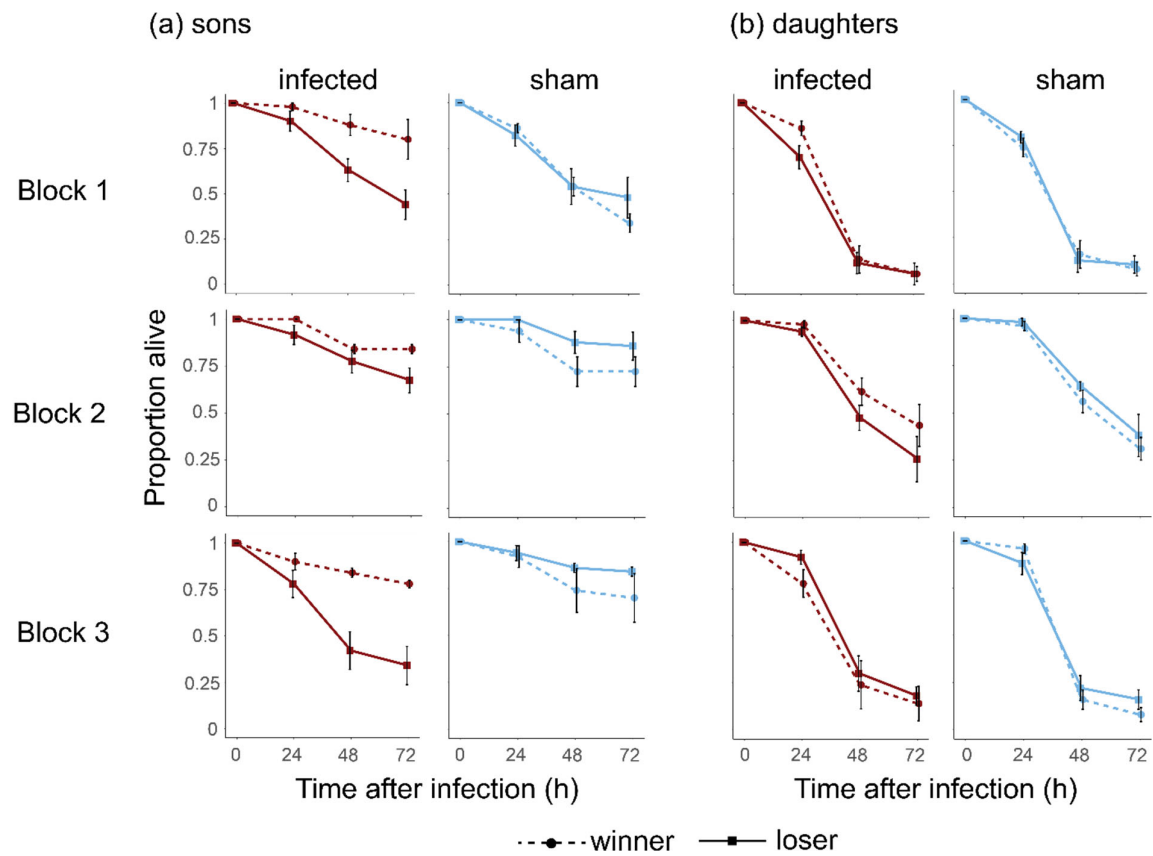

Supplementary Figure S2. Post-infection survival curves of offspring of winner and loser fathers (the same data as in figure 2a,b) split by experimental block. (a) sons and (b) daughters. Symbols are means  $\pm$  SE.

**Supplementary Table 1.** The results of likelihood ratio tests of factors included in the generalized mixed model fitted to offspring survival until 48 h and until 72 h from the beginning of infection.

(a) Joint analysis of offspring of both sexes

| Factor                                                   | 48 h post-infection |          | 72 h post-infection |          |
|----------------------------------------------------------|---------------------|----------|---------------------|----------|
|                                                          | $\chi^2_1$          | <i>p</i> | $\chi^2_1$          | <i>p</i> |
| Mating outcome (winner/loser)                            | 2.8                 | 0.091    | 2.1                 | 0.14     |
| Treatment (infection/sham)                               | 0.3                 | 0.58     | 0.02                | 0.89     |
| Mating outcome $\times$ treatment                        | 17.2                | < 0.0001 | 28.2                | < 0.0001 |
| Offspring sex                                            | 230.3               | < 0.0001 | 303.5               | < 0.0001 |
| Mating outcome $\times$ offspring sex                    | 3.0                 | 0.081    | 3.0                 | 0.081    |
| Treatment $\times$ offspring sex                         | 0.1                 | 0.74     | 0.1                 | 0.81     |
| Mating outcome $\times$ treatment $\times$ offspring sex | 8.0                 | 0.0046   | 7.4                 | 0.0067   |
| Block (random)                                           | 22.9                | < 0.0001 | 15.7                | < 0.0001 |
| Winner-loser duo (random)                                | 3.8                 | 0.051    | 10.1                | 0.0015   |

(b) Separate analysis for offspring of each sex

| Factor                            | Sons 48 h  |          | Daughters 48 h |          | Sons 72 h  |          | Daughters 72 h |          |
|-----------------------------------|------------|----------|----------------|----------|------------|----------|----------------|----------|
|                                   | $\chi^2_1$ | <i>p</i> | $\chi^2_1$     | <i>p</i> | $\chi^2_1$ | <i>p</i> | $\chi^2_1$     | <i>p</i> |
| Mating outcome (winner/loser)     | 5.3        | 0.021    | 0.00           | 0.98     | 5.6        | 0.018    | 0.02           | 0.89     |
| Treatment (infection/sham)        | 0.3        | 0.59     | 0.03           | 0.86     | 0.01       | 0.92     | 0.01           | 0.96     |
| Mating outcome $\times$ treatment | 22.9       | < 0.0001 | 0.9            | 0.33     | 38.6       | < 0.0001 | 3.0            | 0.083    |
| Block (random)                    | 1.2        | 0.27     | 22.9           | < 0.0001 | 4.2        | 0.041    | 10.2           | 0.0014   |
| Winner-loser duo (random)         | 6.3        | 0.012    | 1.7            | 0.19     | 15.4       | < 0.0001 | 10.8           | 0.0010   |

**Supplementary Table 2.** Likelihood ratio test of father's success versus father's post-infection survival as predictors of offspring survival 72 h post-infection (GLMM with binomial error distribution and logit link). Only sires subject to the infection treatment are included.

| Factor                                    | Sons       |         | Daughters  |          |
|-------------------------------------------|------------|---------|------------|----------|
|                                           | $\chi^2_1$ | $p$     | $\chi^2_1$ | $p$      |
| Mating outcome (winner/loser)             | 33.9       | <0.0001 | 0.1        | 0.75     |
| Father's survival (dead/alive)            | 1.2        | 0.26    | 2.6        | 0.10     |
| Mating outcome $\times$ father's survival | 1.8        | 0.18    | 0.0        | 0.98     |
| Block (random)                            | 4.5        | 0.033   | 15.3       | < 0.0001 |
